# Supplementary material for: CCR6 Is a Predicting Biomarker of Radiosensitivity and Potential Target of Radiosensitization in Rectal Cancer
Source: PubMed Central journal article supplement — Cancer Res Treat. 2017 Dec 21;50(4):1203–13. doi: 10.4143/crt.2017.538 (PMC6192915; doi:10.4143/crt.2017.538), 2017-12-21
Supplement: crt-2017-538-suppl3.pdf [file crt-2017-538-suppl3.pdf]

**S3 Table.** Pathoclinical profiles of the 95 patients whose tissue samples underwent immunohistochemical analysis

| <b>Factor</b>          | <b>Resistant group<br/>(n=55)</b> | <b>Sensitive group<br/>(n=40)</b> | <b>Chi-square</b> | <b>p-value</b> |
|------------------------|-----------------------------------|-----------------------------------|-------------------|----------------|
| <b>Sex</b>             |                                   |                                   |                   |                |
| Male                   | 33 (60.0)                         | 28 (70.0)                         | 1.008             | 0.315          |
| Female                 | 22 (40.0)                         | 12 (30.0)                         |                   |                |
| <b>Age (yr)</b>        |                                   |                                   |                   |                |
| ≥ 55                   | 31 (56.4)                         | 17 (42.5)                         | 1.781             | 0.182          |
| < 55                   | 24 (43.6)                         | 23 (57.5)                         |                   |                |
| <b>Differentiation</b> |                                   |                                   |                   |                |
| Well- moderately       | 53 (96.4)                         | 35 (87.5)                         | 2.666             | 0.103          |
| Poorly                 | 2 (3.6)                           | 5 (12.5)                          |                   |                |
| <b>T stage</b>         |                                   |                                   |                   |                |
| T3                     | 31 (56.4)                         | 26 (65.0)                         | 0.720             | 0.396          |
| T4                     | 24 (43.4)                         | 14 (35.0)                         |                   |                |
| <b>N stage</b>         |                                   |                                   |                   |                |
| N-                     | 47 (85.5)                         | 28 (70.0)                         | 3.328             | 0.068          |
| N+                     | 8 (14.5)                          | 12 (30.0)                         |                   |                |
| <b>CCT regimen</b>     |                                   |                                   |                   |                |
| CAPEOX, 4 cycles       | 33 (60.0)                         | 31 (77.5)                         | 3.226             | 0.072          |
| CAPEOX, 2 cycles       | 22 (40.0)                         | 9 (22.5)                          |                   |                |
| <b>CCR6 level</b>      |                                   |                                   |                   |                |
| High                   | 42 (76.3)                         | 15 (37.5)                         | 14.574            | < 0.001        |
| Low                    | 13 (23.7)                         | 25 (62.5)                         |                   |                |

Values are presented as number (%). The radiotherapy of the patients was all done with a technique of intensity-modulated radiotherapy and a dose of 50 Gy in 25 fractions. CCT, concurrent chemotherapy; CAPEOX, capecitabine plus oxaliplatin; CCR6, C-C motif chemokine receptor 6.
